# Supplementary material for: Of Mice and Men — Universality and Breakdown of Behavioral Organization
Source: PLOS journal article supplement (doi:10.1371/journal.pone.0002050), 2008-04-29
Supplement: S7 (10.1371/journal.pone.0002050.s007) [file journal.pone.0002050.s007]

**Table S6. Goodness of fit of cumulative Vazquez' Eq. 8:**  $P(x) = C \int_x^\infty \frac{1-p^2}{4p} \left[ \left( \frac{1+p}{2} \right)^{t-1} - \left( \frac{1-p}{2} \right)^{t-1} \right] \frac{1}{t-1} dt$  **for rescaled cumulative distributions of active periods.**

|             | $\bar{p}$ | $\bar{C}$ | $Err \times 10^{-5}$ | $\chi^2 \times 10^{-3}$ | AIC         | BIC         |
|-------------|-----------|-----------|----------------------|-------------------------|-------------|-------------|
| Adults      | 0.95      | 38.03     | 5.61 ± 4.87          | 12.8 ± 5.04             | -1719 ± 160 | -1712 ± 160 |
| Adolescents | 0.96      | 28.15     | 2.25 ± 1.17          | 8.24 ± 3.42             | -1915 ± 128 | -1908 ± 128 |
| Depression  | 0.96      | 20.56     | 3.54 ± 2.20          | 6.25 ± 3.23             | -1834 ± 198 | -1827 ± 198 |
| WT Mice     | 0.95      | 30.62     | 7.48 ± 5.18          | 7.62 ± 4.82             | -1637 ± 143 | -1630 ± 143 |
| Per2 Mice   | 0.95      | 25.96     | 7.18 ± 2.67          | 7.86 ± 3.15             | -1617 ± 77  | -1610 ± 77  |
